# Supplementary material
Source: PubMed Central journal article supplement (PMC4557867)
Supplement: NIHMS717650-supplement-supp_table_1.pdf [file NIHMS717650-supplement-supp_table_1.pdf]

Supplementary Table 1. Real time PCR primer sequences:

| Gene                 | Primers                                                               |
|----------------------|-----------------------------------------------------------------------|
| <i>TGF1</i>          | 5'-TGC GCT TGC AGA TAA AA-3'<br>5'-AGC CCT GTA TTC CGT CTC CT-3'      |
| <i>TGFRI</i>         | 5'-TGG TTG AGC CTG GGT TTT AC-3'<br>5'-TTA ACA GAG CCC AGC TGC TT-3'  |
| <i>TGFRII</i>        | 5'-GTT CCC AGA ACA GGG TGA AA-3'<br>5'-GTT CCC AGA ACA GGG TGA AA-3'  |
| <i>TGFRIII</i>       | 5'-TCC ATC ATT TGG GGT CGT AT-3'<br>5'-CAA GCT ACA CAG GGG ACC AT -3' |
| <i>fibronectin 1</i> | 5'-AAG GAC AAC CGA GGA AAC CT-3'<br>5'-GCT TGT TTC CTT GCG ACT TC-3'  |
| <i>Id1</i>           | 5'-CCA GTG GGT AGA GGG TTT GA-3'<br>5'-AGA AAT CCG AGA AGC ACG AA-3'  |
| <i>Id2</i>           | 5'-AAA ACA GCC TGT CGG ACC AC-3'<br>5'-CTG GGC ACC AGT TCC TTG AG-3'  |
| <i>18S</i>           | 5'-CGG CTA CCA CAT CCA AGG AA-3'<br>5'-GCT GGA ATT ACC GCG GCT-3'     |

Supplementary Table 2. Metabolic characteristics of *Bgn* KO mice compared to *Bgn* WT mice

| Metabolic Parameters ( <i>n</i> ) | WT: Male (11) | KO: Male (5) | WT: Female (12) | KO: Female (7) | WT vs KO | M vs F           |
|-----------------------------------|---------------|--------------|-----------------|----------------|----------|------------------|
| Plasma Triglyceride (mg/dL)       | 145 ± 26      | 141 ± 16     | 82 ± 14         | 60 ± 15        | N. S.    | <i>p</i> = 0.002 |
| Plasma Total Cholesterol (mg/dL)  | 289 ± 24      | 246 ± 20     | 223 ± 10        | 219 ± 13       | N. S.    | <i>p</i> = 0.021 |
| Glycohemoglobin/ Total Hb (%)     | 5.2 ± 0.2     | 4.1 ± 0.1    | 4.9 ± 0.4       | 5.7 ± 1.0      | N. S.    | N. S.            |

Data are shown as mean ± SEM for *N* = 5–12 per group as indicated, measured after 12 months of normal rodent chow feeding. All analyses were done by two-way ANOVA.
